# Supplementary material for: Asf1 facilitates dephosphorylation of Rad53 after DNA double-strand break repair
Source: PubMed Central journal article supplement — Genes Dev. 2016 May 15;30(10):1211–24. doi: 10.1101/gad.280685.116 (PMC4888841; doi:10.1101/gad.280685.116), 2016-05-15
Supplement: supp_30.10.1211_Supplemental_Fig_S1.pdf [file supp_30.10.1211_Supplemental_Fig_S1.pdf]

Supplemental Fig S1

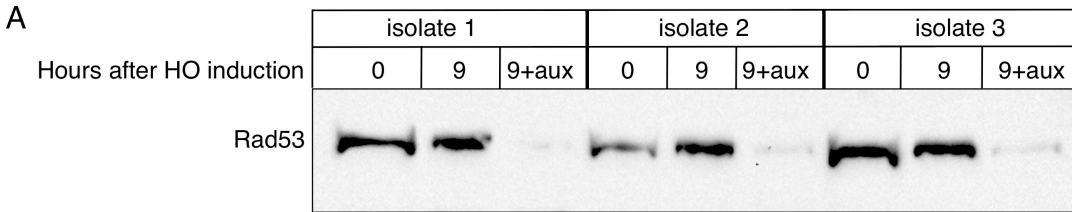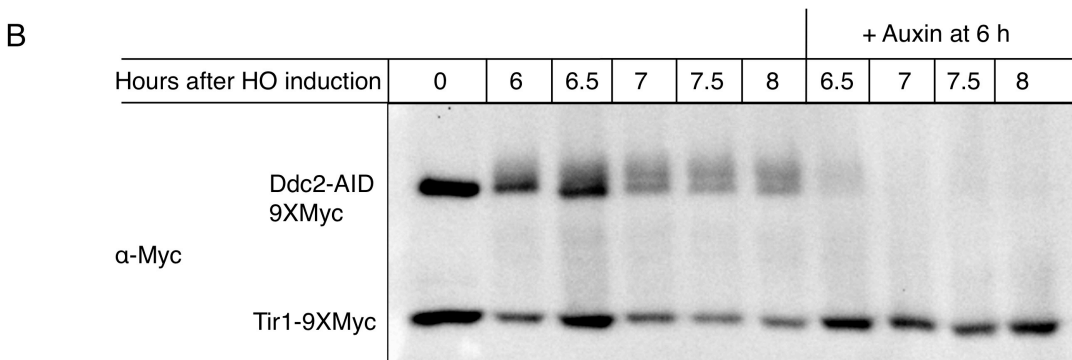

Auxin treatment leads to a depletion of Rad53-AID and Ddc2-AID

A) Addition of auxin to the *asf1Δ* Rad53-AID two DSBs strains leads to rapid Rad53 loss. Cells were induced for 8 h after which the cultures were split and half was treated with 500 μM auxin for 1 h. Rad53 levels were monitored on 10% SDS-PAGE gel.

B) Addition of auxin leads to Ddc2 depletion 30 minutes after treatment. Ddc2-AID and Tir1 are both tagged with 9XMyC. 6 h after DSB induction the culture was split and half was treated with 500 μM auxin.
