# Supplementary material for: Asf1 facilitates dephosphorylation of Rad53 after DNA double-strand break repair
Source: PubMed Central journal article supplement — Genes Dev. 2016 May 15;30(10):1211–24. doi: 10.1101/gad.280685.116 (PMC4888841; doi:10.1101/gad.280685.116), 2016-05-15
Supplement: supp_30.10.1211_Supplemental_Table_S1.pdf [file supp_30.10.1211_Supplemental_Table_S1.pdf]

**Supplemental Table S1 – strain list**

| <b>Name</b> | <b>Genotype</b>                                                                                                                                                                                                     |
|-------------|---------------------------------------------------------------------------------------------------------------------------------------------------------------------------------------------------------------------|
| JKM179      | <i>MAT<math>\alpha</math> ho<math>\Delta</math> hml<math>\Delta</math>::ADE1 hmr<math>\Delta</math>::ADE1 ade1-100 leu2-3,112 trp::hisG lys5<br/>ura3-52 ade3::GAL::HO</i>                                          |
| YMT233      | <i>JKM179 rtt109::KAN</i>                                                                                                                                                                                           |
| YLK09       | <i>JKM179 rtt101::LEU2</i>                                                                                                                                                                                          |
| YJK17       | <i>MAT<math>\alpha</math> ho<math>\Delta</math> hml<math>\Delta</math>::ADE1 hmr<math>\Delta</math>::ADE1 ade1-100 leu2-3,112 trp::hisG lys5<br/>ura3-52 ade3::GAL::HO arg5,6::MAT<math>\alpha</math>-inc::HPHI</i> |
| YJK113      | <i>YJK17 asf1::KAN</i>                                                                                                                                                                                              |
| YJK115      | <i>YJK17 asf1::KAN cac1::NAT</i>                                                                                                                                                                                    |
| YJK117      | <i>YJK17 cac1::NAT</i>                                                                                                                                                                                              |
| YMT129      | <i>YJK17 rtt109::KAN</i>                                                                                                                                                                                            |
| YMT130      | <i>YJK17 asf1::TRP1 rtt109::KAN</i>                                                                                                                                                                                 |
| YLK06       | <i>YJK17 rtt101::LEU2</i>                                                                                                                                                                                           |
| YFA01       | <i>YJK17 pJH592 (ura3-52::HO::URA3)</i>                                                                                                                                                                             |
| YFA02       | <i>YFA01 asf1::TRP1</i>                                                                                                                                                                                             |
| YFA03       | <i>YFA01 cac1::NAT</i>                                                                                                                                                                                              |
| YFA04       | <i>YFA01 asf1::TRP1 cac1::NAT</i>                                                                                                                                                                                   |
| YFA05       | <i>YFA01 cac1::NAT rtt109::KAN</i>                                                                                                                                                                                  |
| YFA06       | <i>YFA01 rtt109::KAN</i>                                                                                                                                                                                            |
| YMV080      | <i>ho<math>\Delta</math> hml<math>\Delta</math>::ADE1 mata<math>\Delta</math>::hisG hmr<math>\Delta</math>::ADE1 his4::[NAT-leu2(Asp718-Sall)]<br/>leu2::HOcs ade3::GAL::HO adel lys5 ura3-52</i>                   |
| YMT169      | <i>YMV080 nat::HPH asf1::TRP1</i>                                                                                                                                                                                   |

|        |                                                                                                                                               |
|--------|-----------------------------------------------------------------------------------------------------------------------------------------------|
| YMT170 | <i>YMV080 nat::HPH</i>                                                                                                                        |
| YLK03  | <i>YFA01 rtt101::LEU2</i>                                                                                                                     |
| YLK04  | <i>YFA01 rtt101::LEU2 asf1::TRP1</i>                                                                                                          |
| YLK05  | <i>YFA01 rtt101::LEU2 rtt109::KAN</i>                                                                                                         |
| YLK08  | <i>YFA01 asf1::TRP1 rtt109::KAN</i>                                                                                                           |
| YLK13  | <i>YFA01 hht2-R129E::LEU2</i>                                                                                                                 |
| YLK14  | <i>YFA01 hht2-R129E::LEU2 rtt101::KAN</i>                                                                                                     |
| YLK15  | <i>YFA01 hht2-R129E::LEU2 asf1::KAN</i>                                                                                                       |
| YLK16  | <i>YFA01 hht2-R129E::LEU2 rtt109::KAN</i>                                                                                                     |
| YMT207 | <i>YFA01 ASF1-3XHA::TRP1</i>                                                                                                                  |
| YMT208 | <i>hoΔ hml::ADE1 MATα hmr::ADE1 ade1-110 leu2,3-112 lys5 trp1::hisG<br/>ura3-52 ade3::GAL:HO ASF1-3XHA::TRP1</i>                              |
| YMT209 | <i>YJK17 ASF1-3XHA::TRP1</i>                                                                                                                  |
| YMT236 | <i>YLK03 ASF1-3XHA::TRP1</i>                                                                                                                  |
| YMT243 | <i>YFA06 ASF1-3XHA::TRP1</i>                                                                                                                  |
| YMT221 | <i>YFA01 ura3-52::TIR1::URA3 RAD53-AID-9XMYC::KAN</i>                                                                                         |
| YMT222 | <i>YMT221 asf1::TRP1</i>                                                                                                                      |
| VE464  | <i>hoΔ hml::ADE1 MATα hmr::ADE1 ade1-110 leu2,3-112 lys5 trp1::hisG<br/>ura3-52 ade3::GAL:HO ura3-52::TIR1::URA3 DDC2-AID-9XMYC::KAN</i>      |
| YMT241 | <i>VE464 asf1::TRP1</i>                                                                                                                       |
| tNS024 | <i>ho HMLα leu2 matΔ::LEU2 hmr-3Δ ma12 ura3-52 trp1 thr GAL<sup>+</sup><br/>pSE271::GAL10::HO (TRP1 ARSI CEN4) pJH592 (ura3-52::HO::URA3)</i> |
| YMT223 | <i>YFA01 pRS314</i>                                                                                                                           |

|        |                                 |
|--------|---------------------------------|
| YMT224 | <i>YFA01 pJH2447 (GAL-PTC2)</i> |
| YMT225 | <i>YFA02 pRS314</i>             |
| YMT226 | <i>YFA02 pJH2447 (GAL-PTC2)</i> |
| YMT248 | <i>YFA01 mad2::KAN</i>          |
| YMT249 | <i>YLK03 mad2::KAN</i>          |
